# Supplementary material for: A comprehensive splicing characterization of COL4A5 mutations and prognostic significance in a single cohort with X-linked alport syndrome
Source: Front Genet. 2025 Jun 11;16:1564343. doi: 10.3389/fgene.2025.1564343 (PMC12187779; doi:10.3389/fgene.2025.1564343)
Supplement: Supplementary file 1 [file Table2.xlsx]

## Sheet: Table S2
Exon	Primers(5’-3’)
Exon3-F	accagaattctggagctcgagGATATAACTTCCAGACGGTTTG
Exon3-R	atcaccagatatctgggatccTCTGTGCTGATCCATCTGACCT
Exon4-F	accagaattctggagctcgagCGTTCTTACGCTCTGCCAATAC
Exon4-R	atcaccagatatctgggatccATGGTACACTAGGAGGATACAC
Exon11+12-F	accagaattctggagctcgagGAGGTACTCACATTCATCTAGCTC
Exon11+12-R	atcaccagatatctgggatccCAGTGGTGATACTTCATAATCTCC
Exon13-F	accagaattctggagctcgagGAGGTAATCAGTGGGTAGTGT
Exon13-R	atcaccagatatctgggatccAGGGATGGACTAACAAGACCAG
Exon17-F	accagaattctggagctcgagCACCTTGATTGTGAGGAGAGGT
Exon17-R	atcaccagatatctgggatccGTGGCGACGTTCTACATTCACA
Exon20-F	accagaattctggagctcgagGCATGAATCACCAGTGTAACAG
Exon20-R	atcaccagatatctgggatccAGGATAGCAAGCTAATTGTG
Exon22-F	accagaattctggagctcgagCAGGATATAGGCTTCTCCAATC
Exon22-R	atcaccagatatctgggatccCTCTGCCACTGGAAACTACACT
Exon24-F	accagaattctggagctcgagGATTCCTTGACTCTTCCTGACT
Exon24-R	atcaccagatatctgggatccACGTAGTCAGTAACAATGTGCC
Exon25-F	accagaattctggagctcgagGTGGCCTACTCAACTATGAAAC
Exon25-R	atcaccagatatctgggatccCTGAACTTGGCTGTTCATAGTC
Exon28-F	accagaattctggagctcgagGGGTAGCAGGCAGAGTAGGTTAGAAG
Exon28-R	atcaccagatatctgggatccAGCAGGGTCTGAGAAGACTCACTCCA
Exon29-F	accagaattctggagctcgagCCTGAAACCAGTCCAAATCATC
Exon29-R	atcaccagatatctgggatccGTGCCGGGCCATGATTTTATT
Exon31-F	accagaattctggagctcgagTGAGAAGCACTGTCTTAGAGCA
Exon31-R	atcaccagatatctgggatccGTGAGCTTCCTGCAGTCATAGA
Exon32-F	accagaattctggagctcgag AGTCAAGTGTGAGGTACAGAATCA
Exon32-R	atcaccagatatctgggatccGTTTCATAGTTGAGTAGGCCAC
Exon35-F	accagaattctggagctcgagCGCTAGACTCCATACTACATGGC
Exon35-R	atcaccagatatctgggatccGAACACTACCCACTGATTACCTC
Exon37-F	accagaattctggagctcgagGTGCTACAGCCACAACACTCAG
Exon37-R	atcaccagatatctgggatccAAATGCTCCACCAAACAGTCTC
Exon40+41-F	accagaattctggagctcgagTCCTAGTTACCGTCTTCCTCTTCA
Exon40+41-R	atcaccagatatctgggatccCATTCTCCTACCACTCACGGACATAC
Exon41-F	accagaattctggagctcgagTCCTCACAGCTATTGGTGATGT
Exon41-R	atcaccagatatctgggatccCTGTGATGACATGCTGAGAAGCT
Exon42-F	accagaattctggagctcgagGACCAGTCTCCTCAGTCTTACG
Exon42-R	atcaccagatatctgggatccCAGTGAGCCACACATAGAACCT
Exon50-F	accagaattctggagctcgagGACTACCCTTGGTGTGGATACT
Exon50-R	atcaccagatatctgggatccTGTAACTTCAATTCCTGGGGTG
